# Supplementary material for: Effects of Origanum vulgare essential oil and its two main components, carvacrol and thymol, on the plant pathogen Botrytis cinerea
Source: PubMed Central journal article supplement (PMC7430266; doi:10.7717/peerj.9626), 2020-08-14

# Qualitative Report

|                                       |                                       |                                 |                                       |
|---------------------------------------|---------------------------------------|---------------------------------|---------------------------------------|
| <b>Date File</b>                      | OVEO 100.D                            | <b>Date Name</b>                | OVEO 100                              |
| <b>Date Type</b>                      |                                       | <b>Location</b>                 | 3                                     |
| <b>Instrument Name</b>                | GCMS                                  | <b>User Name</b>                |                                       |
| <b>Collection Method</b>              | OVEO 100—Hou Huiyu.M                  | <b>Acquisition time</b>         | 2019/4/12 17:27:36 (UTC+08:00)        |
| <b>IRM Calibration Status</b>         | Not Applicable                        | <b>Date Method</b>              | Qualitative.m                         |
| <b>Annotation</b>                     |                                       |                                 |                                       |
| <b>Attenuation</b>                    | Diluted 100 times                     | <b>Sample ID</b>                |                                       |
| <b>Sample Name</b>                    | OVEO 100                              | <b>Sample Location</b>          | 3                                     |
| <b>Sample Type</b>                    |                                       | <b>Date File</b>                | D:\MassHunter\GCMS\1209Hou Huiyu\OVEO |
| <b>Method</b>                         | D:\DATA\Zhou Lin\OVEO 100—Hou Huiyu.M | <b>Coverage Method</b>          |                                       |
| <b>Level Name</b>                     |                                       | <b>Annotation</b>               |                                       |
| <b>Balance to Cover</b>               |                                       | <b>Barcode</b>                  |                                       |
| <b>Balance Time (min)</b>             | 2                                     | <b>Sample Plate Code</b>        |                                       |
| <b>Sample Plate Position</b>          |                                       | <b>Sample Frame Code</b>        |                                       |
| <b>Sample Frame Position</b>          |                                       | <b>Expectation Barcode</b>      |                                       |
| <b>Sample Volume</b>                  |                                       | <b>Double injection volume</b>  | 1                                     |
| <b>Tuning File</b>                    | ATUNE.U                               | <b>Tuning path</b>              | D:\MassHunter\GCMS\1\5977\            |
| <b>Tuning Date Time</b>               | 2019-04-11T12:13:18+08:00             | <b>MS Firmware Version</b>      | 6.00.34                               |
| <b>Operator Name</b>                  |                                       | <b>Acquisition Time</b>         | 2019/4/12 17:27:36 (UTC+08:00)        |
| <b>Sample Locking</b>                 |                                       | <b>Execution completed</b>      | True                                  |
| <b>Operation Mode</b>                 |                                       | <b>Acquisition Time (Local)</b> | 2019/4/12 17:27:36                    |
| <b>Instrument Name</b><br>(UTC+08:00) | GCMS                                  |                                 |                                       |
| <b>Acquisition SW</b>                 | MassHunter GC/MS Acquisition          |                                 |                                       |
| <b>Version</b>                        | B.07.05.2479 23-Aug-2016              |                                 |                                       |
|                                       | Copyright © 1989-2016                 |                                 |                                       |
|                                       | Agilent Technologies, Inc.            |                                 |                                       |

## Chromatogram

Cracking Voltage      Collision Energy 0      Ion Mode      Unassigned

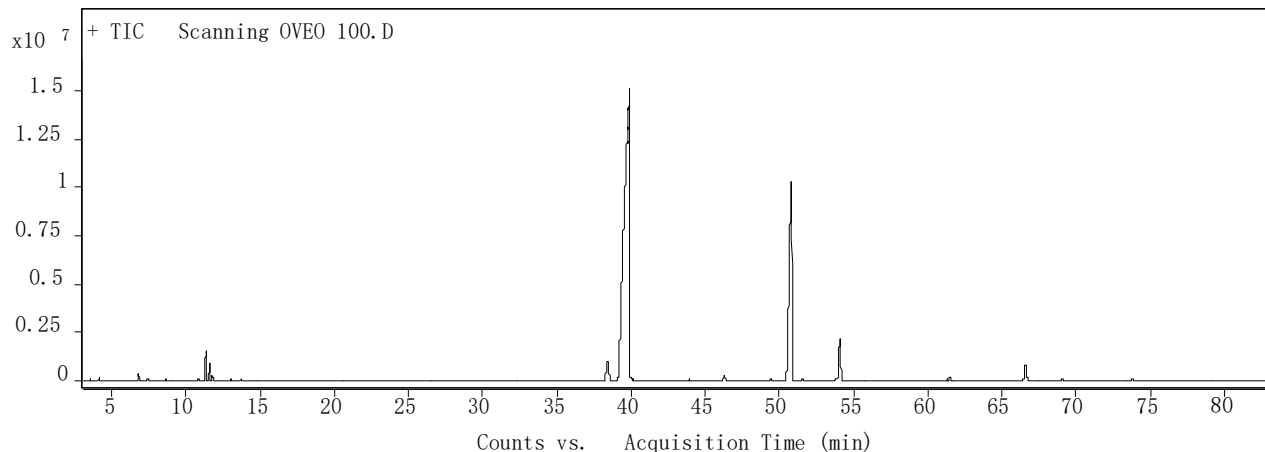

Supplement: peerj-08-9626-s016.pdf [file peerj-08-9626-s016.pdf]
