# Supplementary material for: Effects of Origanum vulgare essential oil and its two main components, carvacrol and thymol, on the plant pathogen Botrytis cinerea
Source: PeerJ journal article supplement (doi:10.7717/peerj.9626), 2020-08-14
Supplement: EC50valuas.zip [file EC50valuas.zip]

## Sheet: o. vulgare（5d）
Date	Concentration	Concentration logarithm	Blocks	Mean of two diameters	Colony diameters	Inhibition ratio	NORMSINV	Probability value of inhibition rate(Y)	Weight coefficient parameter(Z)	Weight coefficient(w)	nw	n*nw	logEC50 Standard Error	Theoretical probability	Theoretical inhibition rate（p)	Theoretical colony diameter	（r-np)	（r-np)*(r-np)/np/(1-p)
1	50	1.69897	3	5.72	52.2	0.235165	-0.721943	4.27806	0.30742	0.525442	1.57633	0.357221	0.0380488	4.21211	0.215381	53.5502	-1.35024	0.0433911
2	100	2	3	4.7	42	0.384615	-0.293381	4.70662	0.382137	0.616973	1.85092	0.0566923	0.195061	4.74239	0.398354	41.0623	0.937681	0.0355898
3	150	2.17609	3	3.73	32.3	0.52674	0.0670773	5.06708	0.398046	0.63558	1.90674	2.21993e-06		5.05258	0.520968	32.6939	-0.39391	0.00990745
4	250	2.39794	3	3.3	28	0.589744	0.226885	5.22689	0.388805	0.624806	1.87442	0.0931526		5.44338	0.671255	22.4368	5.56316	4.19587
5	400	2.60206	3	1.625	11.25	0.835165	0.974778	5.97478	0.248072	0.447028	1.34108	0.244573		5.80295	0.788998	14.4009	-3.1509	3.26733
Control			3	7.325	68.25					∑nw=	8.54949	0.751642
Correlation coefficient	r=	0.973973
Regression equation	Y=	1.21929	+	1.76155
	lgEC50=	2.14624
concentration for 50% of maximal effect	EC50=	140.036
EC50SE	SE=	62.8965
X,2-test	x*x=	7.55209	P=0.05,N=3	x0.05*x0.05=	7.815
lg value of 95% upper confidence limit	1.76392	lg value of 95% lower confidence limit	2.52856
95% confidence upper limit	58.0658	95% confidence lower limit	337.722
	lgEC90=	2.87378
	EC90=	747.794

## Sheet: cavacrol（5d）
Date	Concentration	Concentration logarithm	Blocks	Mean of two diameters	Colony diameters	Inhibition ratio	NORMSINV	Probability value of inhibition rate(Y)	Weight coefficient parameter(Z)	Weight coefficient(w)	nw	n*nw	logEC50 Standard Error	Theoretical probability	Theoretical inhibition rate（p)	Theoretical colony diameter	（r-np)	（r-np)*(r-np)/np/(1-p)
1	2.5	0.39794	3	6.25	57.5	0.13273	-1.11358	3.88642	0.214603	0.40008	1.20024	0.399695	0.0338887	3.89578	0.134749	57.3661	0.133864	0.000361017
2	5	0.69897	3	5.13	46.3	0.301659	-0.519635	4.48037	0.348559	0.576724	1.73017	0.131838	0.184089	4.48892	0.304648	46.1019	0.198135	0.00122461
3	10	1	3	3.85	33.5	0.494721	-0.013233	4.98677	0.398907	0.636579	1.90974	0.00119242		5.08206	0.5327	30.982	2.51803	0.437941
4	15	1.17609	3	2.3	18	0.728507	0.608303	5.6083	0.331557	0.555807	1.66742	0.0674185		5.42902	0.666047	22.1411	-4.14109	2.31923
5	40	1.60206	3	1.26	7.6	0.88537	1.20226	6.20226	0.193659	0.369529	1.10859	0.435884		6.26834	0.897661	6.78505	0.814945	0.956453
Control			3	7.13	66.3					∑nw=	7.61616	1.03603
Correlation coefficient	r=	0.993087
Regression equation	Y=	3.11169	+	1.97037
	lgEC50=	0.958353
concentration for 50% of maximal effect	EC50=	9.08559
EC50SE	SE=	3.85121
X,2-test	x*x=	3.71521	P=0.05,N=3	x0.05*x0.05=	7.815
lg value of 95% upper confidence limit	0.597539	lg value of 95% lower confidence limit	1.31917
95% confidence upper limit	3.95857	95% confidence lower limit	20.853
	lgEC90=	1.60879
	EC90=	40.6248
	lgEC75=	1.30068
	EC75=	19.9837
	lgEC25=	0.616031
	EC25=	4.13077

## Sheet: thymol（6d）
Date	Concentration	Concentration logarithm	Blocks	Mean of two diameters	Colony diameters	Inhibition ratio	NORMSINV	Probability value of inhibition rate(Y)	Weight coefficient parameter(Z)	Weight coefficient(w)	nw	n*nw	logEC50Standard Error	Theoretical probability	Theoretical inhibition rate（p)	Theoretical colony diameter	（r-np)	（r-np)*(r-np)/np/(1-p)
1	10	1	3	6.46	59.6	0.188011	-0.88525	4.11475	0.269612	0.476151	1.42845	0.381612	0.0285004	4.13103	0.192432	59.2755	0.324502	0.00219978
2	20	1.30103	3	4.475	39.75	0.458447	-0.104347	4.89565	0.396776	0.634105	1.90232	0.0886199	0.16882	4.92654	0.470721	38.8491	0.900897	0.0394715
3	40	1.60206	3	2.025	15.25	0.792234	0.814198	5.8142	0.286391	0.4983	1.4949	0.0108499		5.72205	0.764869	17.2586	-2.00862	0.994212
4	60	1.77815	3	1.3	8	0.891008	1.23191	6.23191	0.186796	0.359303	1.07791	0.0735887		6.1874	0.882464	8.62711	-0.627111	0.387841
5	80	1.90309	3	1.0625	5.625	0.923365	1.42808	6.42808	0.143899	0.29263	0.877889	0.130954		6.51756	0.935438	4.73887	0.886134	2.56653
Control			3	7.84	73.4					∑nw=	6.78147	0.685624
Correlation coefficient	r=	0.997391
Regression equation	Y=	1.4884	+	2.64263
	lgEC50=	1.32883
concentration for 50% of maximal effect	EC50=	21.322
EC50SE	SE=	8.28835
X,2-test	x*x=	3.99025	P=0.05,N=3	x0.05*x0.05=	7.815
lg value of 95% upper confidence limit	0.997939	lg value of 95% lower confidence limit	1.65972
95% confidence upper limit	9.95266	95% confidence lower limit	45.6789
	lgEC90=	1.8138
	EC90=	65.1327
	lgEC75=	1.58407
	EC75=	38.3765
	lgEC25=	1.07359
	EC25=	11.8465
