# Supplementary material for: Effects of Origanum vulgare essential oil and its two main components, carvacrol and thymol, on the plant pathogen Botrytis cinerea
Source: PeerJ journal article supplement (doi:10.7717/peerj.9626), 2020-08-14
Supplement: Effects_of_carvacrol_and_thymol_on_cell_leakage_of_B._cinerea.zip [file Effects_of_carvacrol_and_thymol_on_cell_leakage_of_B._cinerea.zip]

## Sheet: carvacrol
0min	1	2	3	AVERAGE	STDEV		10min	1	2	3	AVERAGE	STDEV		40min	1	2	3	AVERAGE	STDEV		140min	1	2	3	AVERAGE	STDEV		220min	1	2	3	AVERAGE	STDEV		360min	1	2	3	AVERAGE	STDEV		400min	1	2	3	AVERAGE	STDEV		dead treatment
carvacrol 500 μg/mL	11.248	12.968	11.89	12.0353	0.869161		carvacrol 500 μg/mL	21.922	21.131	21.101	21.3847	0.465586		carvacrol 500 μg/mL	33.521	32.231	30.383	32.045	1.57725		carvacrol 500 μg/mL	78.467	77.542	79.391	78.4667	0.9245		carvacrol 500 μg/mL	83.091	82.78	83.403	83.0913	0.3115		carvacrol 500 μg/mL	87.423	88.063	87.743	87.743	0.32		carvacrol 500 μg/mL	89.571	89.754	89.662	89.6623	0.0915005		carvacrol 500 μg/mL
carvacrol 200 μg/mL	11.058	11.108	12.5	11.5553	0.818487		carvacrol 200 μg/mL	14.064	14.435	14.617	14.372	0.281832		carvacrol 200 μg/mL	23.8	21.989	20.347	22.0453	1.72719		carvacrol 200 μg/mL	60.353	61.227	59.322	60.3007	0.953578		carvacrol 200 μg/mL	72.112	72.536	72.324	72.324	0.212		carvacrol 200 μg/mL	82.126	80.651	81.711	81.496	0.760641		carvacrol 200 μg/mL	84.167	84.732	83.842	84.247	0.450361		carvacrol 200 μg/mL
carvacrol 50 μg/mL	8.102	7.984	9.601	8.56233	0.901445		carvacrol 50 μg/mL	11.17	11.488	11.276	11.3113	0.161918		carvacrol 50 μg/mL	21.844	20.593	22.67	21.7023	1.04572		carvacrol 50 μg/mL	38.132	39.437	39.904	39.1577	0.918431		carvacrol 50 μg/mL	43.787	46.673	44.082	44.8473	1.58794		carvacrol 50 μg/mL	53.257	54.768	53.42	53.815	0.829336		carvacrol 50 μg/mL	59.916	60.214	59.319	59.8163	0.455748		carvacrol 50 μg/mL
carvacrol 10 μg/mL	6.905	7.635	7.67	7.40333	0.431924		carvacrol 10 μg/mL	9.951	9.782	10.242	9.99167	0.232681		carvacrol 10 μg/mL	15.722	16.89	16.34	16.3173	0.58433		carvacrol 10 μg/mL	36.773	35.463	34.668	35.6347	1.06295		carvacrol 10 μg/mL	41.594	40.275	39.332	40.4003	1.1362		carvacrol 10 μg/mL	50.01	48.897	47.619	48.842	1.19645		carvacrol 10 μg/mL	51.914	51.864	50.744	51.5073	0.661539		carvacrol 10 μg/mL
vinclozolin 500 μg/mL	13.055	13.318	13.006	13.1263	0.167787		vinclozolin 500 μg/mL	21.779	20.159	22.25	21.396	1.09685		vinclozolin 500 μg/mL	24.525	23.327	25.133	24.3283	0.918922		vinclozolin 500 μg/mL	45.698	47.503	45.765	46.322	1.02332		vinclozolin 500 μg/mL	54.329	53.375	52.002	53.2353	1.16977		vinclozolin 500 μg/mL	62.24	62.169	62.908	62.439	0.407714		vinclozolin 500 μg/mL	67.47	66.509	65.503	66.494	0.983586		vinclozolin 500 μg/mL
procymidone 500 μg/mL	8.889	9.062	9.138	9.02967	0.12761		procymidone 500 μg/mL	14.832	13.222	14.383	14.1457	0.830825		procymidone 500 μg/mL	16.973	15.843	14.325	15.7137	1.32873		procymidone 500 μg/mL	38.764	39.305	40.22	39.4297	0.735962		procymidone 500 μg/mL	45.866	45.201	45.68	45.5823	0.343089		procymidone 500 μg/mL	55.124	54.662	57.079	55.6217	1.28305		procymidone 500 μg/mL	55.685	58.998	57.05	57.2443	1.66503		procymidone 500 μg/mL
sterile water Control	6.694	7.392	7.828	7.30467	0.572022		sterile water Control	8.589	7.872	9.525	8.662	0.828914		sterile water Control	14.047	14.153	13.898	14.0327	0.128103		sterile water Control	26.881	27.192	26.868	26.9803	0.183424		sterile water Control	31.44	32.828	33.732	32.6667	1.15449		sterile water Control	40.414	40.592	41.207	40.7377	0.917516		sterile water Control	43.084	42.954	42.489	42.8423	0.312823		sterile water Control
solvent Control	8.518	9.461	10.62	9.533	1.05285		solvent Control	12.306	13.425	13.187	12.9727	0.589486		solvent Control	16.262	15.425	14.588	15.425	0.837		solvent Control	30.305	30.569	30.701	30.525	0.201633		solvent Control	36.466	37.345	38.224	37.345	0.879		solvent Control	45.672	46.785	47.492	46.6497	0.416085		solvent Control	48.801	49.546	46.633	48.3267	1.51332		solvent Control
	0min							10min																40min													140min
	Ct（average）	C0	Cd	relative conductivity/%				Ct（average）	1	2	3	C0	Cd	relative conductivity/%	1	2	3	STDEV			1	2	3	Ct（average）	C0	Cd	relative conductivity/%	1	2	3	STDEV			1	2	3	Ct（average）	C0	Cd	relative conductivity/%	1	2	3	STDEV			1	2	3
carvacrol 500 μg/mL	12.0353			0			carvacrol 500 μg/mL	21.3847	21.922	21.131	21.101	12.0353	105.451	8.86602	9.37557	8.62546	8.59701	0.441517		carvacrol 500 μg/mL	33.521	32.231	30.383	32.045	12.0353	105.451	18.9753	20.375	19.1516	17.3992	1.49571		carvacrol 500 μg/mL	78.467	77.542	79.391	78.4667	12.0353	105.451	62.9971	62.9975	62.1203	63.8737	0.876708		carvacrol 500 μg/mL	83.091	82.78	83.403
carvacrol 200 μg/mL	11.5553			0			carvacrol 200 μg/mL	14.372	14.064	14.435	14.617	11.5553	97.2803	2.89541	2.5788	2.96017	3.14726	0.289711		carvacrol 200 μg/mL	23.8	21.989	20.347	22.0453	11.5553	97.2803	10.7833	12.587	10.7254	9.03746	1.77548		carvacrol 200 μg/mL	60.353	61.227	59.322	60.3007	11.5553	97.2803	50.1081	50.1619	51.0603	49.1021	0.980237		carvacrol 200 μg/mL	72.112	72.536	72.324
carvacrol 50 μg/mL	8.56233			0			carvacrol 50 μg/mL	11.3113	11.17	11.488	11.276	8.56233	91.6817	2.99842	2.84426	3.19111	2.95988	0.176609		carvacrol 50 μg/mL	21.844	20.593	22.67	21.7023	8.56233	91.6817	14.3322	14.4867	13.1222	15.3877	1.1406		carvacrol 50 μg/mL	38.132	39.437	39.904	39.1577	8.56233	91.6817	33.3713	32.2525	33.6759	34.1853	1.00176		carvacrol 50 μg/mL	43.787	46.673	44.082
carvacrol 10 μg/mL	7.40333			0			carvacrol 10 μg/mL	9.99167	9.951	9.782	10.242	7.40333	86.9093	2.9782	2.93141	2.73695	3.26624	0.267728		carvacrol 10 μg/mL	15.722	16.89	16.34	16.3173	7.40333	86.9093	10.2567	9.57166	10.9156	10.2827	0.672344		carvacrol 10 μg/mL	36.773	35.463	34.668	35.6347	7.40333	86.9093	32.4837	33.7935	32.2861	31.3714	1.22305		carvacrol 10 μg/mL	41.594	40.275	39.332
vinclozolin 500 μg/mL	13.1263			0			vinclozolin 500 μg/mL	21.396	21.779	20.159	22.25	13.1263	96.78	8.54481	8.94055	7.26665	9.42722	1.13335		vinclozolin 500 μg/mL	24.525	23.327	25.133	24.3283	13.1263	96.78	11.5747	11.7779	10.5401	12.4061	0.949496		vinclozolin 500 μg/mL	45.698	47.503	45.765	46.322	13.1263	96.78	34.3001	33.6554	35.5204	33.7246	1.05737		vinclozolin 500 μg/mL	54.329	53.375	52.002
procymidone 500 μg/mL	9.02967			0			procymidone 500 μg/mL	14.1457	14.832	13.222	14.383	9.02967	94.0363	5.44045	6.17031	4.45821	5.69284	0.883515		procymidone 500 μg/mL	16.973	15.843	14.325	15.7137	9.02967	94.0363	7.10789	8.44709	7.24543	5.63116	1.413		procymidone 500 μg/mL	38.764	39.305	40.22	39.4297	9.02967	94.0363	32.3279	31.62	32.1954	33.1684	0.782636		procymidone 500 μg/mL	45.866	45.201	45.68
sterile water Control	7.30467			0			sterile water Control	8.662	8.589	7.872	9.525	7.30467	83.357	1.62834	1.54076	0.680607	2.66364	0.994415		sterile water Control	14.047	14.153	13.898	14.0327	7.30467	83.357	8.07131	8.0885	8.21567	7.90975	0.15368		sterile water Control	26.881	27.192	26.868	26.9803	7.30467	83.357	23.6041	23.4849	23.858	23.4693	0.220046		sterile water Control	31.44	32.828	33.732
solvent Control	9.533			0			solvent Control	12.9727	12.306	13.425	13.187	9.533	89.7773	3.83133	3.08875	4.33517	4.07007	0.65661		solvent Control	16.262	15.425	14.588	15.425	9.533	89.7773	6.5629	7.49521	6.5629	5.6306	0.932307		solvent Control	30.305	30.569	30.701	30.525	9.533	89.7773	23.3823	23.1372	23.4313	23.5783	0.224593		solvent Control	36.466	37.345	38.224
relative conductivity/%									STDEV
reagents	0min	10min	40min	140min	220min	360min	400min		reagents	0min	10min	40min	140min	220min	360min	400min
carvacrol 500 μg/mL	0	8.86602	18.9753	62.9971	67.3827	71.7939	73.6141		carvacrol 500 μg/mL	0	0.441517	1.49571	0.876708	0.295397	0.303458	0.0867703
carvacrol 200 μg/mL	0	2.89541	10.7833	50.1081	62.4676	71.896	74.7239		carvacrol 200 μg/mL	0	0.289711	1.77548	0.980237	0.217927	0.781906	0.462952
carvacrol 50 μg/mL	0	2.99842	14.3322	33.3713	39.5772	49.3585	55.9043		carvacrol 50 μg/mL	0	0.176609	1.1406	1.00176	1.73201	0.904583	0.497098
carvacrol 10 μg/mL	0	2.9782	10.2567	32.4837	37.9672	47.6803	50.7471		carvacrol 10 μg/mL	0	0.267728	0.672344	1.22305	1.30734	1.37666	0.761182
vinclozolin 500 μg/mL	0	8.54481	11.5747	34.3001	41.4435	50.9534	55.1433		vinclozolin 500 μg/mL	0	1.13335	0.949496	1.05737	1.20869	0.42128	1.01631
procymidone 500 μg/mL	0	5.44045	7.10789	32.3279	38.8708	49.5468	51.2724		procymidone 500 μg/mL	0	0.883515	1.413	0.782636	0.364848	1.36442	1.77062
sterile water Control	0	1.62834	8.07131	23.6041	30.4258	40.1082	42.6331		sterile water Control	0	0.994415	0.15368	0.220046	1.38499	0.49916	0.375281
solvent Control	0	3.83133	6.5629	23.3823	30.9789	41.343	43.211		solvent Control	0	0.65661	0.932307	0.224593	0.979089	1.02199	1.68564
relative conductivity/%									STDEV
	0	10	40	140	220	360	400			0	10	40	140	220	360	400
carvacrol 500 μg/mL	0	8.86602	18.9753	62.9971	67.3827	71.7939	73.6141		carvacrol 500 μg/mL	0	0.441517	1.49571	0.876708	0.295397	0.303458	0.0867703
carvacrol 200 μg/mL	0	2.89541	10.7833	50.1081	62.4676	71.896	74.7239		carvacrol 200 μg/mL	0	0.289711	1.77548	0.980237	0.217927	0.781906	0.462952
carvacrol 10 μg/mL	0	2.9782	10.2567	32.4837	37.9672	47.6803	50.7471		carvacrol 10 μg/mL	0	0.267728	0.672344	1.22305	1.30734	1.37666	0.761182
vinclozolin 500 μg/mL	0	8.54481	11.5747	34.3001	41.4435	50.9534	55.1433		vinclozolin 500 μg/mL	0	1.13335	0.949496	1.05737	1.20869	0.42128	1.01631
Control	0	3.83133	6.5629	23.3823	30.9789	41.343	43.211		Control	0	0.65661	0.932307	0.224593	0.979089	1.02199	1.68564
[truncated: 32 more columns]

## Sheet: thymol
0min	1	2	3	AVERAGE	STDEV		10min	1	2	3	AVERAGE	STDEV		40min	1	2	3	AVERAGE	STDEV		140min	1	2	3	AVERAGE	STDEV		220min	1	2	3	AVERAGE	STDEV		360min	1	2	3	AVERAGE	STDEV		400min	1	2	3	AVERAGE	STDEV		dead treatment
thymol 500 μg/mL	12.004	12.793	12.247	12.348	0.40408		thymol 500 μg/mL	26.93	25.383	24.231	25.5147	1.35431		thymol 500 μg/mL	49.048	48.721	49.376	49.0483	0.041		thymol 500 μg/mL	65.619	64.559	64.559	64.9123	0.611991		thymol 500 μg/mL	76.728	75.492	76.11	76.11	0.618		thymol 500 μg/mL	81.562	82.692	82.127	82.127	0.565		thymol 500 μg/mL	84.781	85.165	85.548	85.1647	0.3835		thymol 500 μg/mL
thymol 200 μg/mL	12.994	13.084	12.585	12.8877	0.265952		thymol 200 μg/mL	25.615	24.586	24.172	24.791	0.743022		thymol 200 μg/mL	34.138	34.222	34.053	34.1377	0.0845005		thymol 200 μg/mL	54.601	52.326	55.54	54.1557	1.65263		thymol 200 μg/mL	65.291	63.997	66.707	65.3317	1.35546		thymol 200 μg/mL	79.775	80.884	81.32	80.6597	0.796555		thymol 200 μg/mL	82.07	83.457	84.355	83.294	1.15119		thymol 200 μg/mL
thymol 70 μg/mL	10.18	10.487	10.532	10.3997	0.191563		thymol 70 μg/mL	20.072	19.596	20.548	20.072	0.476		thymol 70 μg/mL	24.118	24.077	24.159	24.118	0.041		thymol 70 μg/mL	31.386	31.751	31.021	31.386	0.365		thymol 70 μg/mL	36.047	35.469	36.625	36.047	0.578		thymol 70 μg/mL	44.106	44.058	44.154	44.106	0.048		thymol 70 μg/mL	46.014	45.694	45.854	45.854	0.16		thymol 70 μg/mL
vinclozolin 500 μg/mL	11.717	12.418	12.55	12.2283	0.447719		vinclozolin 500 μg/mL	19.792	19.554	19.859	19.735	0.16029		vinclozolin 500 μg/mL	26.41	25.92	26.529	26.2863	0.322785		vinclozolin 500 μg/mL	31.541	31.626	32.846	32.0043	0.730143		vinclozolin 500 μg/mL	35.187	36.775	36.841	36.2677	0.936466		vinclozolin 500 μg/mL	42.153	43.549	44.382	43.3613	1.12629		vinclozolin 500 μg/mL	44.141	45.083	44.612	44.612	0.471		vinclozolin 500 μg/mL
sterile water Control	10.809	10.827	10.727	10.7877	0.0533042		sterile water Control	18.38	18.39	18.37	18.38	0.01		sterile water Control	22.862	22.618	22.873	22.7843	0.144154		sterile water Control	28.79	28.72	26.637	28.049	1.22333		sterile water Control	31.763	31.97	29.692	31.1417	1.25971		sterile water Control	36.772	37.167	35.25	36.3963	1.01221		sterile water Control	37.476	38.431	36.385	37.4307	1.02375		sterile water Control
solvent Control	9.286	9.027	9.264	9.19233	0.143605		solvent Control	17.538	17.667	17.704	17.6363	0.0871455		solvent Control	21.659	20.2	20.822	20.8937	0.732135		solvent Control	27.004	27.481	26.493	26.9927	0.494097		solvent Control	30.227	30.857	30.621	30.5683	0.318285		solvent Control	36.98	37.102	37.476	37.186	0.258449		solvent Control	37.789	38.457	36.841	37.6957	0.812033		solvent Control
	0min							10min																40min													140min
	Ct（average）	C0	Cd	relative conductivity/%				Ct（average）	1	2	3	C0	Cd	relative conductivity/%	1	2	3	STDEV			1	2	3	Ct（average）	C0	Cd	relative conductivity/%	1	2	3	STDEV			1	2	3	Ct（average）	C0	Cd	relative conductivity/%	1	2	3	STDEV			1	2	3
thymol 500 μg/mL	12.348			0			thymol 500 μg/mL	25.5147	26.93	25.383	24.231	12.348	95.621	13.7696	15.2498	13.6319	12.4272	1.41633		thymol 500 μg/mL	49.048	48.721	49.376	49.0483	12.348	95.621	38.381	38.3807	38.0387	38.7237	0.342498		thymol 500 μg/mL	65.619	64.559	64.559	64.9123	12.348	95.621	54.9715	55.7106	54.602	54.602	0.640018		thymol 500 μg/mL	76.728	75.492	76.11
thymol 200 μg/mL	12.8877			0			thymol 200 μg/mL	24.791	25.615	24.586	24.172	12.8877	104.177	11.4261	12.2171	11.2293	10.8319	0.713232		thymol 200 μg/mL	34.138	34.222	34.053	34.1377	12.8877	104.177	20.398	20.3984	20.479	20.3168	0.0811127		thymol 200 μg/mL	54.601	52.326	55.54	54.1557	12.8877	104.177	39.6135	40.041	37.8572	40.9423	1.58637		thymol 200 μg/mL	65.291	63.997	66.707
thymol 70 μg/mL	10.3997			0			thymol 70 μg/mL	20.072	20.072	19.596	20.548	10.3997	89.009	10.8667	10.8667	10.3319	11.4015	0.534777		thymol 70 μg/mL	24.118	24.077	24.159	24.118	10.3997	89.009	15.4123	15.4123	15.3662	15.4584	0.0460628		thymol 70 μg/mL	31.386	31.751	31.021	31.386	10.3997	89.009	23.5778	23.5778	23.9878	23.1677	0.410071		thymol 70 μg/mL	36.047	35.469	36.625
vinclozolin 500 μg/mL	12.2283			0			vinclozolin 500 μg/mL	19.735	19.792	19.554	19.859	12.2283	84.9337	8.83827	8.90538	8.62516	8.98427	0.188724		vinclozolin 500 μg/mL	26.41	25.92	26.529	26.2863	12.2283	84.9337	16.5517	16.6973	16.1204	16.8375	0.380044		vinclozolin 500 μg/mL	31.541	31.626	32.846	32.0043	12.2283	84.9337	23.2841	22.7385	22.8386	24.275	0.859662		vinclozolin 500 μg/mL	35.187	36.775	36.841
sterile water Control	10.7877			0			sterile water Control	18.38	18.38	18.39	18.37	10.7877	85.341	8.89647	8.89647	8.90818	8.88475	0.0117177		sterile water Control	22.862	22.618	22.873	22.7843	10.7877	85.341	14.0573	14.1483	13.8624	14.1612	0.168915		sterile water Control	28.79	28.72	26.637	28.049	10.7877	85.341	20.2263	21.0946	21.0126	18.5718	1.43346		sterile water Control	31.763	31.97	29.692
solvent Control	9.19233			0			solvent Control	17.6363	17.538	17.667	17.704	9.19233	85.6943	9.85363	9.73888	9.88941	9.93259	0.101693		solvent Control	21.659	20.2	20.822	20.8937	9.19233	85.6943	13.6547	14.5478	12.8453	13.5711	0.854357		solvent Control	27.004	27.481	26.493	26.9927	9.19233	85.6943	20.7719	20.7851	21.3417	20.1888	0.576581		solvent Control	30.227	30.857	30.621
relative conductivity/%									STDEV
reagents	0min	10min	40min	140min	220min	360min	400min		reagents	0min	10min	40min	140min	220min	360min	400min
thymol 500 μg/mL	0	13.7696	38.381	54.9715	66.682	72.9746	76.1513		thymol 500 μg/mL	0	1.41633	0.342498	0.640018	0.646302	6.87597	0.401063
thymol 200 μg/mL	0	11.4261	20.398	39.6135	50.3414	65.0549	67.5836		thymol 200 μg/mL	0	0.713232	0.0811127	1.58637	1.30111	0.76462	1.10503
thymol 70 μg/mL	0	10.8667	15.4123	23.5778	28.8143	37.8685	39.8323		thymol 70 μg/mL	0	0.534777	0.0460628	0.410071	0.649373	0.0539271	0.179757
vinclozolin 500 μg/mL	0	8.83827	16.5517	23.2841	28.3037	36.6557	38.1282		vinclozolin 500 μg/mL	0	0.188724	0.380044	0.859662	1.10259	1.32608	0.55455
sterile water Control	0	8.89647	14.0573	20.2263	23.8502	30.0075	31.2195		sterile water Control	0	0.0117177	0.168915	1.43346	1.47609	1.18608	1.1996
solvent Control	0	9.85363	13.6547	20.7719	24.9445	32.6669	33.2616		solvent Control	0	0.101693	0.854357	0.576581	0.371419	0.301594	0.947592
relative conductivity/%									STDEV
	0	10	40	140	220	360	400			0	10	40	140	220	360	400
thymol 500 μg/mL	0	13.7696	38.381	54.9715	66.682	75.7884	76.1513		thymol 500 μg/mL	0	1.41633	0.342498	0.640018	0.646302	0.590874	0.401063
thymol 200 μg/mL	0	11.4261	20.398	39.6135	50.3414	65.0549	67.5836		thymol 200 μg/mL	0	0.713232	0.0811127	1.58637	1.30111	0.76462	1.10503
thymol 70 μg/mL	0	10.8667	15.4123	23.5778	28.8143	37.8685	39.8323		thymol 70 μg/mL	0	0.534777	0.0460628	0.410071	0.649373	0.0539271	0.179757
vinclozolin 500 μg/mL	0	8.83827	16.5517	23.2841	28.3037	36.6557	38.1282		vinclozolin 500 μg/mL	0	0.188724	0.380044	0.859662	1.10259	1.32608	0.55455
Control	0	8.89647	14.0573	20.2263	23.8502	30.0075	31.2195		Control	0	0.0117177	0.168915	1.43346	1.47609	1.18608	1.1996
[truncated: 32 more columns]
