# Supplementary material for: Effects of Origanum vulgare essential oil and its two main components, carvacrol and thymol, on the plant pathogen Botrytis cinerea
Source: PeerJ journal article supplement (doi:10.7717/peerj.9626), 2020-08-14
Supplement: fresh_and_dry_mycelial_weight.zip [file fresh_and_dry_mycelial_weight.zip]

## Sheet: Sheet1
3d													wet
carvacrol wet/mg	1	2	3	AVERAGE	STDEV	wet weight inhibition rate1	wet weight inhibition rate2	wet weight inhibition rate3	Mean wet weight inhibition rate	STDEV				cavacrol	STDEV	thymol	STDEV
EC50	23.8	22.5	19.5	21.9333	2.2053	85.7627	86.5404	88.335	86.8794	1.31922			EC₅₀	21.9333	2.2053	37.5	1.2
EC90	7.6	4.3	5.6	5.83333	1.66233	95.4536	97.4277	96.65	96.5105	0.994413			EC₉₀	5.83333	1.66233	3.03333	0.208167
CK	162	162.6	176.9	167.167	8.43465								CK	167.167	8.43465	170.9	12.1528
													dry
carvacrol dry/mg	1	2	3	AVERAGE	STDEV	dry weight inhibition rate1	dry weight inhibition rate2	dry weight inhibition rate3	Mean dry weight inhibition rate	STDEV				cavacrol	STDEV	thymol	STDEV
EC50	9	7.2	8.7	8.3	0.964365	76.7241	81.3793	77.5	78.5345	2.49405			EC₅₀	8.3	0.964365	11.3167	0.700595
EC90	3.1	5	4.3	4.13333	0.960902	91.9828	87.069	88.8793	89.3103	2.48509			EC₉₀	4.13333	0.960902	1.51667	0.0288675
CK	37	37.9	41.1	38.6667	2.15484								CK	38.6667	2.15484	37.6433	1.6083
3d													wet weight inhibition rate
thymol wet/mg	1	2	3	AVERAGE	STDEV	wet weight inhibition rate1	wet weight inhibition rate2	wet weight inhibition rate3	Mean wet weight inhibition rate	STDEV				cavacrol	STDEV	thymol	STDEV
													CK		0		0
EC50	36.3	38.7	37.5	37.5	1.2	78.7595	77.3552	78.0573	78.0573	0.405395			EC₅₀	86.8794	1.31922	78.0573	0.405395
EC90	2.8	3.1	3.2	3.03333	0.208167	98.3616	98.1861	98.1276	98.2251	0.0490855			EC₉₀	96.5105	0.994413	98.2251	0.0490855
CK	170.6	158.9	183.2	170.9	12.1528
													dry weight inhibition rate
thymol dry/mg	1	2	3	AVERAGE	STDEV	dry weight inhibition rate1	dry weight inhibition rate2	dry weight inhibition rate3	Mean dry weight inhibition rate	STDEV				cavacrol	STDEV	thymol	STDEV
													CK		0		0
EC50	10.6	11.35	12	11.3167	0.700595	71.841	69.8486	68.1218	69.9371	1.02345			EC₅₀	78.5345	2.49405	69.9371	1.02345
EC90	1.5	1.5	1.55	1.51667	0.0288675	96.0152	96.0152	95.8824	95.971	0.0676315			EC₉₀	89.3103	2.48509	95.971	0.0676315
CK	36.75	36.68	39.5	37.6433	1.6083
																											独立样本t检验干重，香芹酚sig值大于0.05，差异不显著；百里酚sig＜0.01，差异极显著
