# Supplementary material for: Effects of Origanum vulgare essential oil and its two main components, carvacrol and thymol, on the plant pathogen Botrytis cinerea
Source: PeerJ journal article supplement (doi:10.7717/peerj.9626), 2020-08-14
Supplement: protective_and_therapeutic_effects.zip [file protective_and_therapeutic_effects.zip]

## Sheet: therapeutic effict
protective effect	spot diameter
name	1	1	1	AVERAGE1	2	2	2	AVERAGE2	3	3	3	AVERAGE3	4	4	4	AVERAGE4	5	5	5	AVERAGE5	6	6	6	AVERAGE6	7	7	7	AVERAGE7	8	8	8	AVERAGE8	9	9	9	AVERAGE9
contorl	3	3.1	3	3.03333	3.05	3	3.1	3.05	2.65	2.6	2.8	2.68333	2.6	2.6	2.6	2.6	2.85	3.1	2.6	2.85	3	2.8	2.9	2.9	2.4	2.55	2.6	2.51667	2.6	2.7	2.6	2.63333	2.55	2.6	2.4	2.51667
O. vulgare 500μg/mL	2	2	2	2	2.6	2.7	3	2.76667	2.6	2.6	2.6	2.6	2.5	2.6	2.5	2.53333	2.6	2.5	2.4	2.5	2.65	2.7	2.6	2.65	2.5	2.5	2.5	2.5	2.6	2.6	2.6	2.6	2.35	2.35	2.2	2.3
O. vulgare 1000μg/mL	1.8	1.8	1.8	1.8	2.2	2.2	2.2	2.2	1.9	1.9	1.9	1.9	2.1	2.2	2.1	2.13333	2.35	2.4	2.35	2.36667	2.5	2.5	2.6	2.53333	2.2	2.3	2.3	2.26667	2.4	2.45	2.4	2.41667	2.2	2.3	2.35	2.28333
carvacrol 500μg/mL	2.2	2.2	2.2	2.2	2.05	2	2.05	2.03333	2.1	2.2	2.1	2.13333	2.6	2.6	2.6	2.6	2.6	3	2.8	2.8	2.15	2.15	2.2	2.16667	2.4	2.4	2.45	2.41667	2.8	2.8	2.6	2.73333	2.4	2.4	2.4	2.4
carvacrol 1000μg/mL	2.2	2.2	2.2	2.2	2.1	2.1	2.1	2.1	2.1	2	2.1	2.06667	2.25	2.2	2.3	2.25	2.5	2.5	2.5	2.5	2.4	2.4	2.45	2.41667	1.55	1.5	1.55	1.53333	1.4	1.45	1.3	1.38333	1.3	1.4	1.45	1.38333
thymol 500μg/mL	2.6	2.5	2.7	2.6	2.4	2.6	2.45	2.48333	2.35	2.2	2.3	2.28333	2.55	2.55	2.55	2.55	2.95	3	2.9	2.95	2.7	2.7	2.65	2.68333	2.1	2	2.1	2.06667	2.5	2.5	2.5	2.5	2.1	2.1	2.1	2.1
thymol 1000μg/mL	1.8	1.9	1.9	1.86667	1.85	1.9	2	1.91667	1.75	1.7	1.85	1.76667	2	2.1	2.05	2.05	2	2	2	2	2.25	2.5	2.4	2.38333	1.9	1.9	2	1.93333	2.15	2	2.15	2.1	2.2	2.2	2.2	2.2
pyrimethanil 400μg/mL	2.1	2	2	2.03333	2.4	2.4	2.5	2.43333	1.8	1.8	1.8	1.8	2.1	2.2	2.2	2.16667	2.1	2.1	2.2	2.13333	2	2	2	2	2.1	2.1	2.2	2.13333	2	2	2	2	1.4	1.5	1.6	1.5
protective effect	spot diameter
name	1	2	3	4	5	6	7	8	9	AVERAGE	STDEV.P	control effects	control effects1	control effects2	control effects3	control effects4	control effects5	control effects6	control effects7	control effects8	control effects9	AVERAGE	STDEV.P
contorl	3.03333	3.05	2.68333	2.6	2.85	2.9	2.51667	2.63333	2.51667	2.7537	0.197793
O. vulgare 500μg/mL	2	2.76667	2.6	2.53333	2.5	2.65	2.5	2.6	2.3	2.49444	0.211986	9.41493	27.3705	-0.470746	5.58171	8.00269	9.21318	3.76597	9.21318	5.58171	16.4761	9.41493	7.69823
O. vulgare 1000μg/mL	1.8	2.2	1.9	2.13333	2.36667	2.53333	2.26667	2.41667	2.28333	2.21111	0.223745	19.7041	34.6335	20.1076	31.002	22.5286	14.0551	8.00269	17.6866	12.2394	17.0814	19.7041	8.12523
carvacrol 500μg/mL	2.2	2.03333	2.13333	2.6	2.8	2.16667	2.41667	2.73333	2.4	2.38704	0.260315	13.3154	20.1076	26.1601	22.5286	5.58171	-1.68124	21.3181	12.2394	0.739744	12.8447	13.3154	9.45328
carvacrol 1000μg/mL	2.2	2.1	2.06667	2.25	2.5	2.41667	1.53333	1.38333	1.38333	1.98148	0.410393	28.043	20.1076	23.7391	24.9496	18.2919	9.21318	12.2394	44.3174	49.7646	49.7646	28.043	14.9033
thymol 500μg/mL	2.6	2.48333	2.28333	2.55	2.95	2.68333	2.06667	2.5	2.1	2.46852	0.265558	10.3564	5.58171	9.81843	17.0814	7.39744	-7.12845	2.55548	24.9496	9.21318	23.7391	10.3564	9.64368
thymol 1000μg/mL	1.86667	1.91667	1.76667	2.05	2	2.38333	1.93333	2.1	2.2	2.02407	0.175702	26.4963	32.2125	30.3968	35.844	25.5548	27.3705	13.4499	29.7915	23.7391	20.1076	26.4963	6.38056
pyrimethanil 400μg/mL	2.03333	2.43333	1.8	2.16667	2.13333	2	2.13333	2	1.5	2.02222	0.244444	26.5636	26.1601	11.6342	34.6335	21.3181	22.5286	27.3705	22.5286	27.3705	45.5279	26.5636	8.87693

## Sheet: protective effect
protective effect	spot diameter
name	1	1	1	AVERAGE1	2	2	2	AVERAGE2	3	3	3	AVERAGE3	4	4	4	AVERAGE4	5	5	5	AVERAGE5	6	6	6	AVERAGE6	7	7	7	AVERAGE7	8	8	8	AVERAGE8	9	9	9	AVERAGE9
contorl	2.7	2.9	2.8	2.8	2.85	2.7	2.9	2.81667	2.6	2.6	2.6	2.6	2.3	2.3	2.4	2.33333	2.2	2.5	2.4	2.36667	2.3	2.4	2.5	2.4	2	2.2	2.6	2.26667	2.2	2.2	2.2	2.2	2.3	2.5	2.6	2.46667
O. vulgare 500μg/mL	1.65	1.7	1.65	1.66667	1.9	1.9	2.05	1.95	2	2	2	2	1.8	1.95	2	1.91667	1.9	1.9	1.9	1.9	2.2	2.2	2.4	2.26667	2.1	2.1	2.1	2.1	2.3	2.3	2.35	2.31667	1.9	1.9	2	1.93333
O. vulgare 1000μg/mL	1.4	1.4	1.5	1.43333	1.4	1.4	1.4	1.4	1.65	1.65	1.65	1.65	1.9	2	1.8	1.9	1.05	1.05	1.05	1.05	1.5	1.5	1.6	1.53333	1.55	1.55	1.55	1.55	1.5	1.5	1.5	1.5	1.65	1.7	1.65	1.66667
carvacrol 500μg/mL	1.6	1.6	1.6	1.6	1.6	1.6	1.6	1.6	1.7	1.7	1.7	1.7	1.55	1.6	1.55	1.56667	1.7	1.7	1.75	1.71667	1.6	1.6	1.6	1.6	1.1	1.1	1.1	1.1	1.5	1.5	1.5	1.5	1.1	1.1	1.1	1.1
carvacrol 1000μg/mL	0.7	0.7	0.7	0.7	0.9	1	0.9	0.933333	0.55	0.55	0.6	0.566667	0.5	0.5	0.5	0.5	0.7	0.7	0.7	0.7	0.2	0.2	0.2	0.2	0.4	0.4	0.4	0.4	0.4	0.4	0.4	0.4	0.5	0.5	0.5	0.5
thymol 500μg/mL	2	2	2	2	1.75	1.8	1.75	1.76667	1.75	1.75	1.75	1.75	2.1	2.1	2.15	2.11667	1.8	1.8	1.8	1.8	1.8	1.8	1.8	1.8	1.5	1.6	1.7	1.6	1.5	1.5	1.5	1.5	1.4	1.4	1.4	1.4
thymol 1000μg/mL	1.3	1.3	1.3	1.3	1.8	1.8	1.8	1.8	1.7	1.7	1.7	1.7	1.5	1.5	1.5	1.5	1.2	1.1	1.15	1.15	1.1	1.1	1.1	1.1	1.2	1.2	1.2	1.2	1.25	1.2	1.25	1.23333	1	1.05	1.1	1.05
pyrimethanil 400μg/mL	1.1	1.2	1.1	1.13333	1.1	1.1	1.1	1.1	1.9	1.9	1.9	1.9	1.85	1.8	1.8	1.81667	1.7	1.8	1.7	1.73333	1.75	1.75	1.8	1.76667	1.05	1.05	1.1	1.06667	1.1	1.1	1.1	1.1	1	1	1.1	1.03333
protective effect	spot diameter
name	1	2	3	4	5	6	7	8	9	AVERAGE	STDEV.P	control effects	control effects1	control effects2	control effects3	control effects4	control effects5	control effects6	control effects7	control effects8	control effects9	AVERAGE	STDEV.P
contorl	2.8	2.81667	2.6	2.33333	2.36667	2.4	2.26667	2.2	2.46667	2.47222	0.209349
O. vulgare 500μg/mL	1.66667	1.95	2	1.91667	1.9	2.26667	2.1	2.31667	1.93333	2.00556	0.187413	18.8764	32.5843	21.1236	19.1011	22.4719	23.1461	8.31461	15.0562	6.29213	21.7978	18.8764	7.58073
O. vulgare 1000μg/mL	1.43333	1.4	1.65	1.9	1.05	1.53333	1.55	1.5	1.66667	1.52037	0.217843	38.5019	42.0225	43.3708	33.2584	23.1461	57.5281	37.9775	37.3034	39.3258	32.5843	38.5019	8.81161
carvacrol 500μg/mL	1.6	1.6	1.7	1.56667	1.71667	1.6	1.1	1.5	1.1	1.49815	0.221449	39.4007	35.2809	35.2809	31.236	36.6292	30.5618	35.2809	55.5056	39.3258	55.5056	39.4007	8.9575
carvacrol 1000μg/mL	0.7	0.933333	0.566667	0.5	0.7	0.2	0.4	0.4	0.5	0.544444	0.201231	77.9775	71.6854	62.2472	77.0787	79.7753	71.6854	91.9101	83.8202	83.8202	79.7753	77.9775	8.13967
thymol 500μg/mL	2	1.76667	1.75	2.11667	1.8	1.8	1.6	1.5	1.4	1.74815	0.213357	29.2884	19.1011	28.5393	29.2135	14.382	27.191	27.191	35.2809	39.3258	43.3708	29.2884	8.63018
thymol 1000μg/mL	1.3	1.8	1.7	1.5	1.15	1.1	1.2	1.23333	1.05	1.33704	0.253223	45.9176	47.4157	27.191	31.236	39.3258	53.4831	55.5056	51.4607	50.1124	57.5281	45.9176	10.2427
pyrimethanil 400μg/mL	1.13333	1.1	1.9	1.81667	1.73333	1.76667	1.06667	1.1	1.03333	1.40556	0.35987	43.1461	54.1573	55.5056	23.1461	26.5169	29.8876	28.5393	56.8539	55.5056	58.2022	43.1461	14.5565
