# Supplementary material for: Effects of Origanum vulgare essential oil and its two main components, carvacrol and thymol, on the plant pathogen Botrytis cinerea
Source: PeerJ journal article supplement (doi:10.7717/peerj.9626), 2020-08-14
Supplement: spore_germination_statistics.zip [file spore_germination_statistics.zip]

## Sheet: Sheet1
carvacrol	1	2	3	AVERAGE	STDEV
ck	100	100	100	100	0
50	90.43	90.31	90.78	90.5067	0.244199
150	78.14	79.81	80.65	79.5333	1.27767
200	23.4	25.74	27.49	25.5433	2.05208
250	1.49	1.23	2.3	1.67333	0.558062
300	0	0	0	0	0
thymol	1	2	3	AVERAGE	STDEV
ck	100	100	100	100	0
50	85.81	88.44	89.69	87.98	1.98048
150	77.25	79.47	81.6	79.44	2.17516
200	11.19	11.9	16.67	13.2533	2.98014
250	0	0	0	0	0
300	0	0	0	0	0
O. vulgare	1	2	3	AVERAGE	STDEV
ck	100	100	100	100	0
50	100	100	100	100	0
150	100	100	100	100	0
200	100	100	100	100	0
250	90	90	89.47	89.8233	0.305996
300	79.71	79.07	81.31	80.03	1.15378
